# Supplementary material for: Hierarchical Co1.4Ni0.6P@C hollow nanoflowers assembled from ultrathin nanosheets as an anode material for high-performance lithium-ion batteries
Source: Royal Society of Chemistry journal article supplement (doi:10.1039/d3ta01050c), 2023-01-01
Supplement: d3ta01050c1.pdf [file d3ta01050c1.pdf]

## Supporting Information

### **Hierarchical $\text{Co}_{1.4}\text{Ni}_{0.6}\text{P}@C$ hollow nanoflowers assembled by ultrathin nanosheets as an anode material for high-performance lithium-ion batteries**

Jinghua Kong, Zhe Cui, Qian Liu\*, Mengluan Gao, Wenqing Wang and Rujia Zou\*

State Key Laboratory for Modification of Chemical Fibers and Polymer Materials,  
College of Materials Science and Engineering, Donghua University, Shanghai 201620,  
China. E-mail: rjzou@dhu.edu.cn

College of Science, Donghua University, Shanghai 201620, P. R. China. E-mail:  
qianliu@dhu.edu.cn

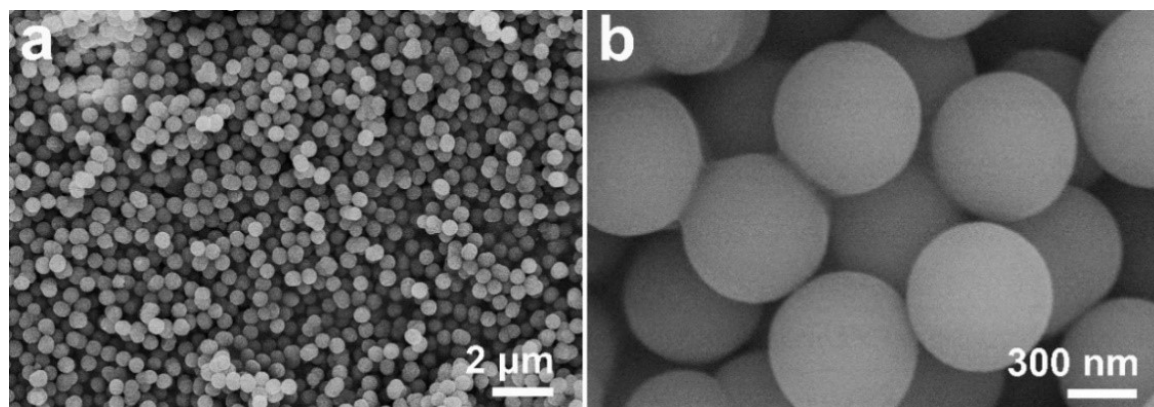

**Fig. S1** (a) and (b) SEM image and Enlarged image of the NiCo-glycerate nanospheres.

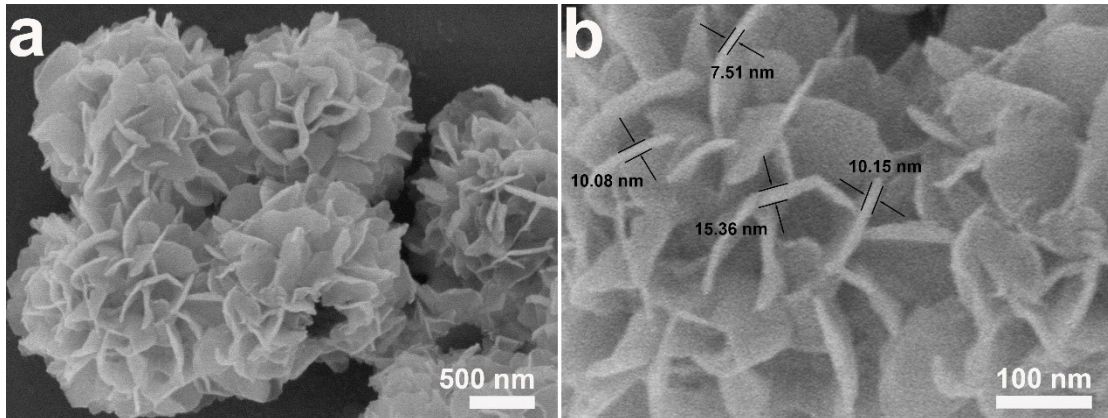

**Fig. S2** (a) and (b) SEM images of the  $\text{NiCo(OH)}_x$ .

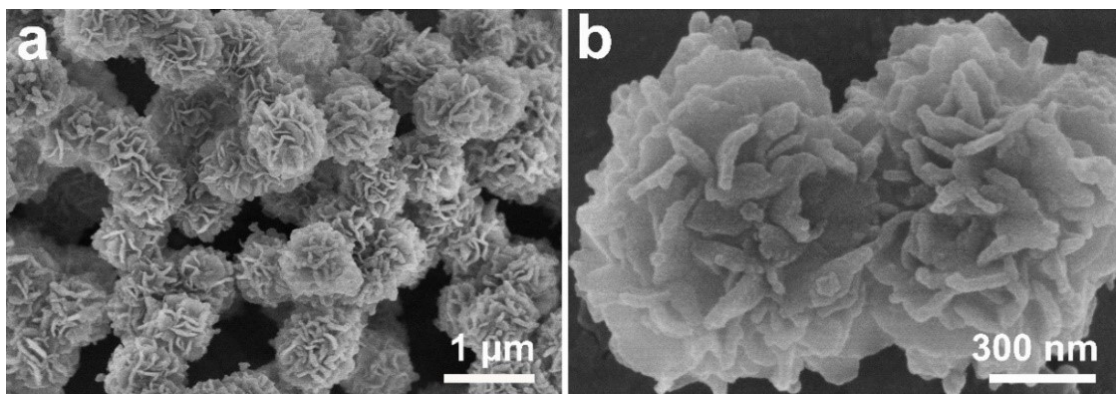

**Fig. S3** (a) and (b) SEM images of the  $\text{NiCo(OH)}_x@PDA$  at different magnification.

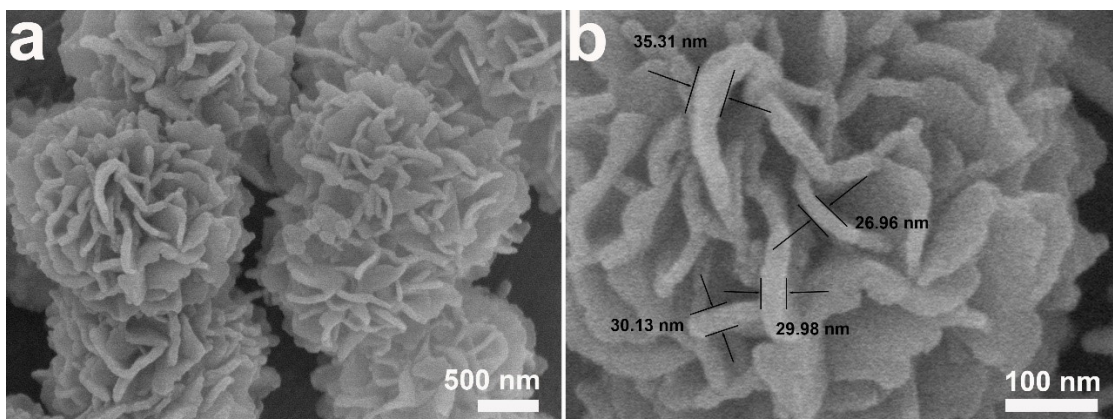

**Fig. S4** (a) and (b) SEM images of the  $\text{Co}_{1.4}\text{Ni}_{0.6}\text{P}@C$  HNFs.

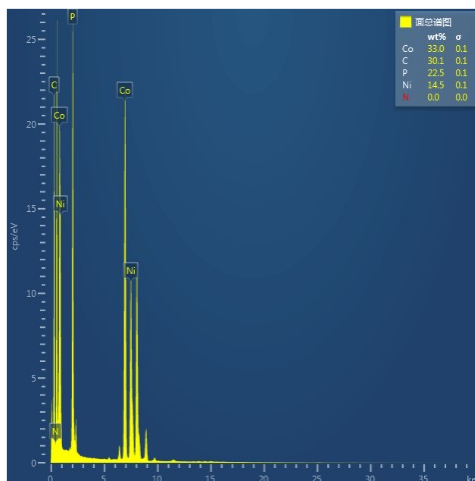

**Fig. S5** EDX spectrum of the  $\text{Co}_{1.4}\text{Ni}_{0.6}\text{P}@C$  HNFs.

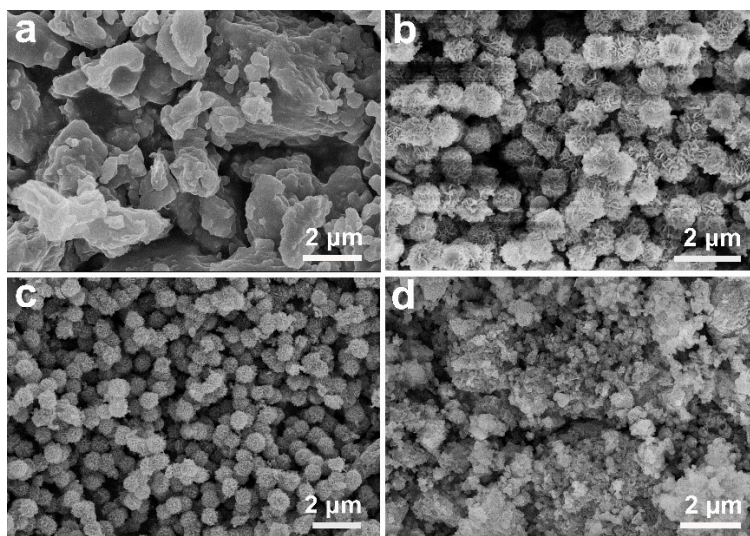

**Fig. S6** SEM images of the  $\text{Ni}_2\text{P}@C$  (a),  $\text{Ni}_{1.4}\text{Co}_{0.6}\text{P}@C$  (b),  $\text{NiCoP}@C$  (c) and  $\text{CoP}@C$  (d).

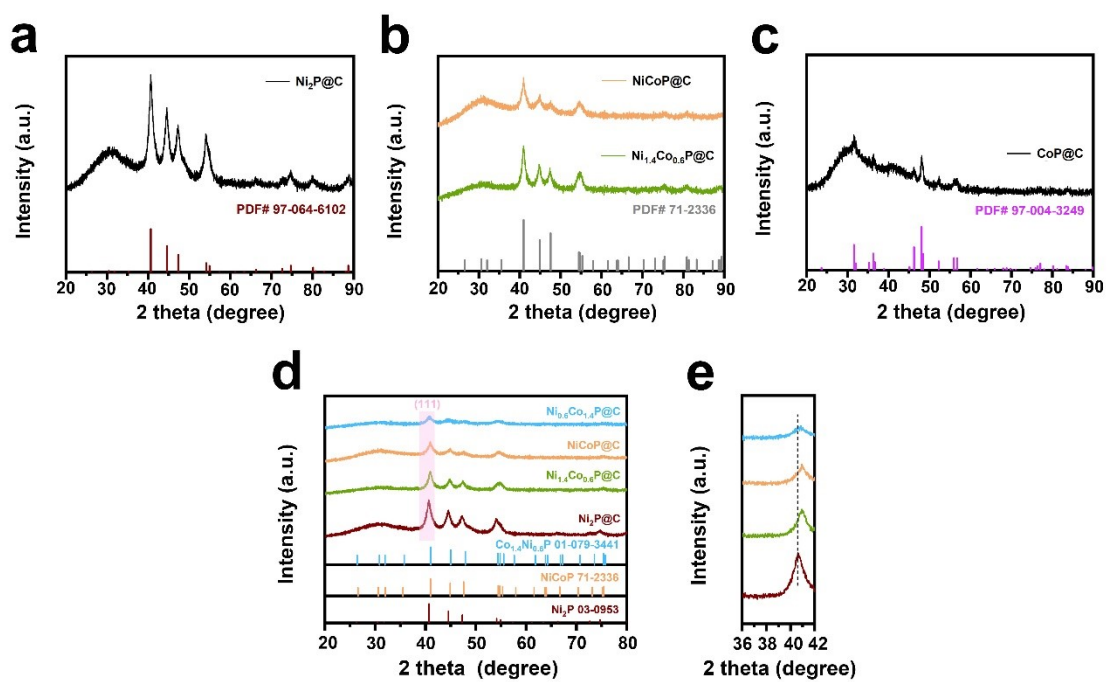

**Fig. S7** XRD patterns of the  $\text{Ni}_2\text{P}@C$  (a),  $\text{Ni}_{1.4}\text{Co}_{0.6}\text{P}@C$  and  $\text{NiCoP}@C$  (b),  $\text{CoP}@C$  (c),  $\text{Ni}_2\text{P}@C$ ,  $\text{Ni}_{1.4}\text{Co}_{0.6}\text{P}@C$ ,  $\text{NiCoP}@C$  and  $\text{Ni}_{0.6}\text{Co}_{1.4}\text{P}@C$  (d), the corresponding partial magnification patterns in a  $2\theta$  range of  $36\text{-}42^\circ$  (e).

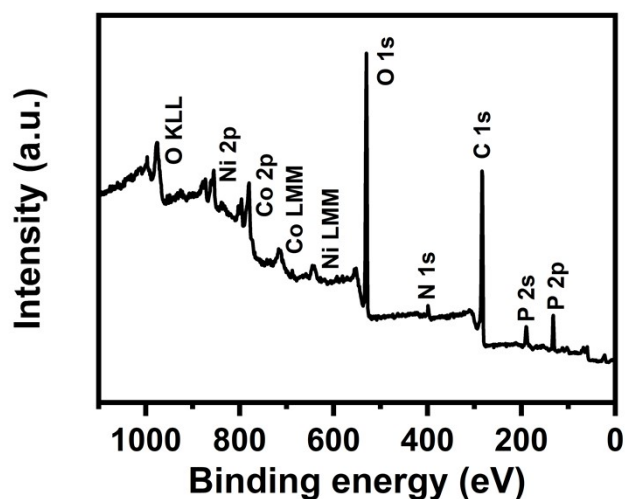

**Fig. S8** XPS full-spectrum of the  $\text{Co}_{1.4}\text{Ni}_{0.6}\text{P}@C$  HNFs.

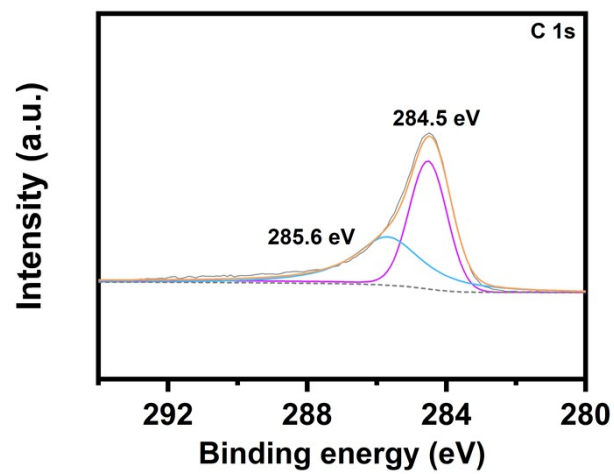

**Fig. S9** High-resolution XPS spectra of C 1s in Co<sub>1.4</sub>Ni<sub>0.6</sub>P@C HNFs.

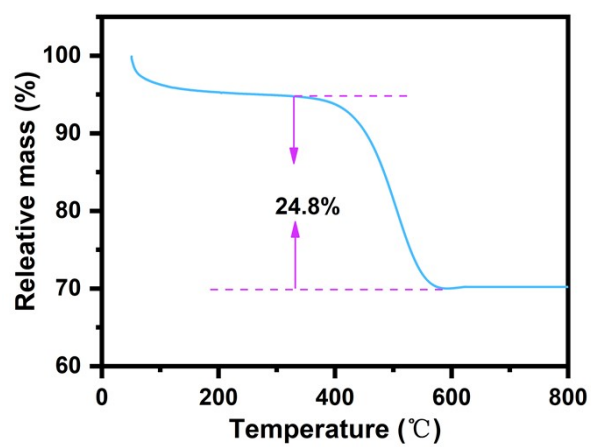

**Fig. S10** TGA pattern of the Co<sub>1.4</sub>Ni<sub>0.6</sub>P@C HNFs.

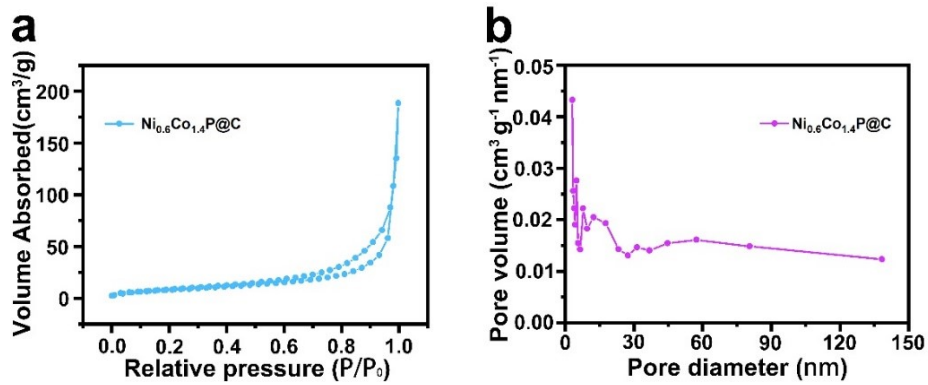

**Fig. S11** (a) and (b) Nitrogen adsorption and desorption isotherms of the  $\text{Co}_{1.4}\text{Ni}_{0.6}\text{P}@C$  HNFs.

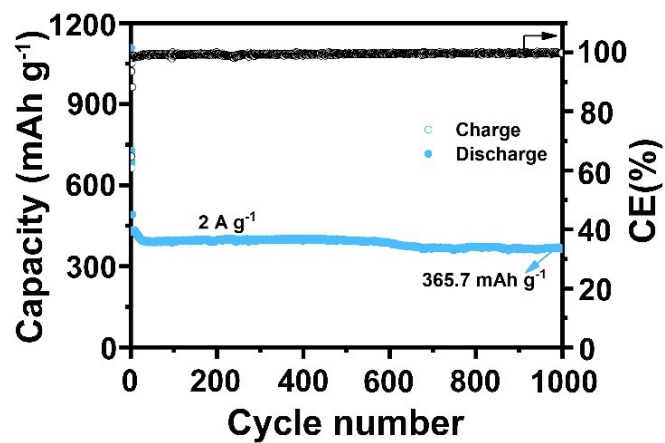

**Fig. S12** Long-term cycling performance of the  $\text{Co}_{1.4}\text{Ni}_{0.6}\text{P}@C$  electrode at  $2.0 \text{ A g}^{-1}$ .

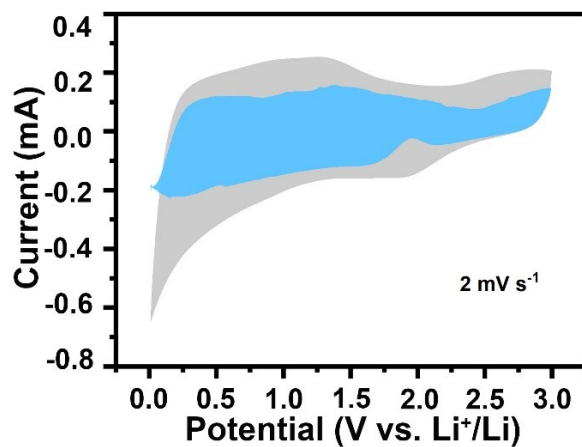

**Fig. S13** CV curve of the  $\text{Co}_{1.4}\text{Ni}_{0.6}\text{P}@C$  electrode at  $2 \text{ mV s}^{-1}$ , the shaded area shows the capacitive controlled regions.

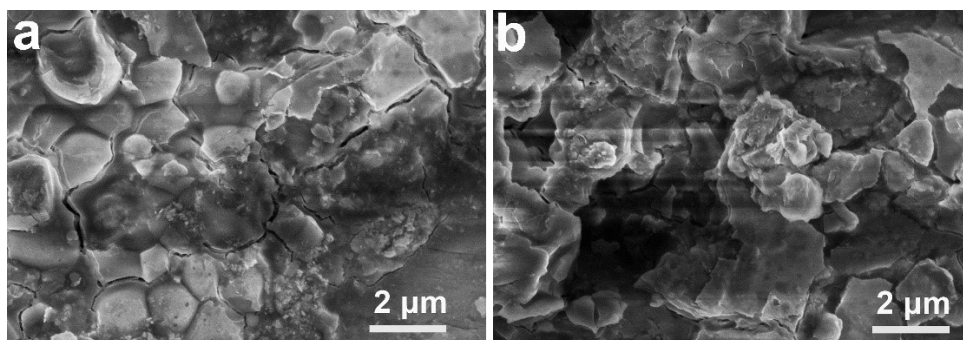

**Fig. S14** (a)  $\text{NiCoP}@C$  electrode after 2000 cycles at the current density of  $10 \text{ A g}^{-1}$ .  
(b)  $\text{Ni}_{1.4}\text{Co}_{0.6}\text{P}@C$  electrode after 2000 cycles at the current density of  $10 \text{ A g}^{-1}$ .
